# Supplementary material
Source: PubMed Central journal article supplement (PMC7852537)
Supplement: 41386_2020_838_MOESM2_ESM.pdf [file 41386_2020_838_MOESM2_ESM.pdf]

Assessed for eligibility (n = 262306)

Excluded (n = 182958)

- (n=23351) Not attached to eligible site (A or B)
- (n=15570) No MDD diagnosis (ICD-9 296x or 311)
- (n=27699) Prescriptions between october-2007 and march-2008
- (n=86487) <1 prescription for any target med after march-2008
- (n=9298) Age not in 18-80 years
- (n=7226) No prescription before bipolar code
- (n=8727) Confounding codes associated to bipolar
- (n=4601) No code after 90 days from index prescription

Assessed for treatment (n=79347, from which 1152 switch to bipolar)

**Site A**

**Site B**

Excluded from A (n=6884)

- (n=4182) <1 event in history
- (n=2702) with other meds

Excluded from B (n=4656)

- (n=2574) <1 event in history
- (n=2082) with other meds

Site A (n=42547, from which 636 switch to bipolar)

- (n=29779) Training set
- (n=4265) Validation set
- (n=8503) Test set

Site B (n=25260, from which 289 switch to bipolar)  
(n=25260) Test set
